# Supplementary figures and images for: Effect of crustose lichen (&lt;i&gt;Ochrolecia frigida&lt;/i&gt;) on soil CO&lt;sub&gt;2&lt;/sub&gt; efflux in a sphagnum moss community over western Alaska tundra
Source: Copernicus journal article supplement (doi:10.5194/bg-2019-121), 2019-04-12

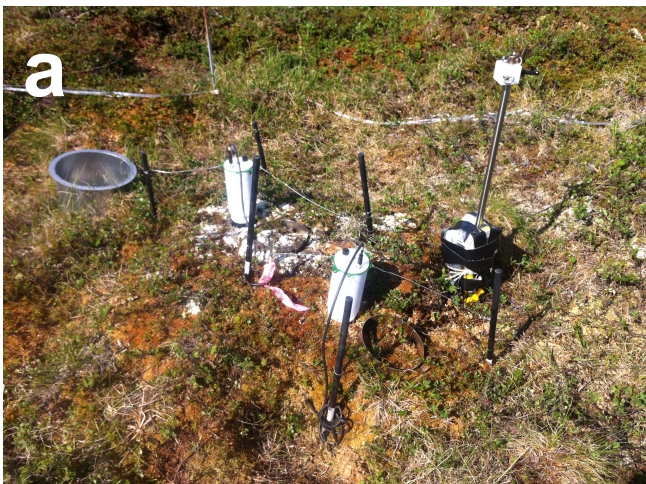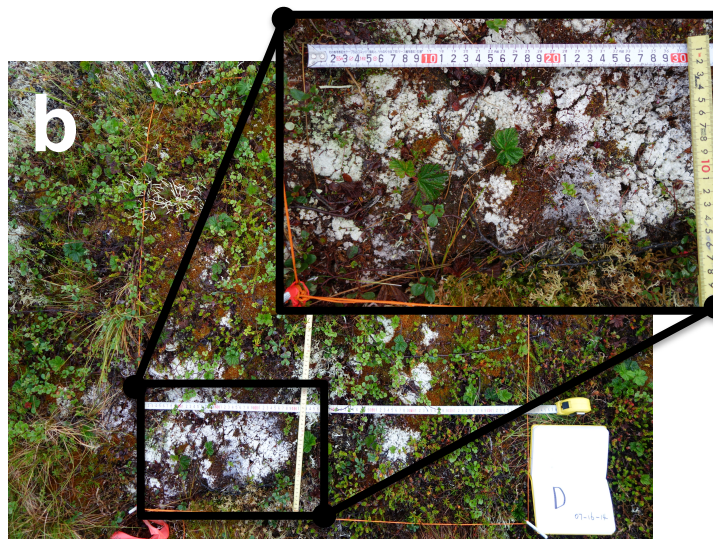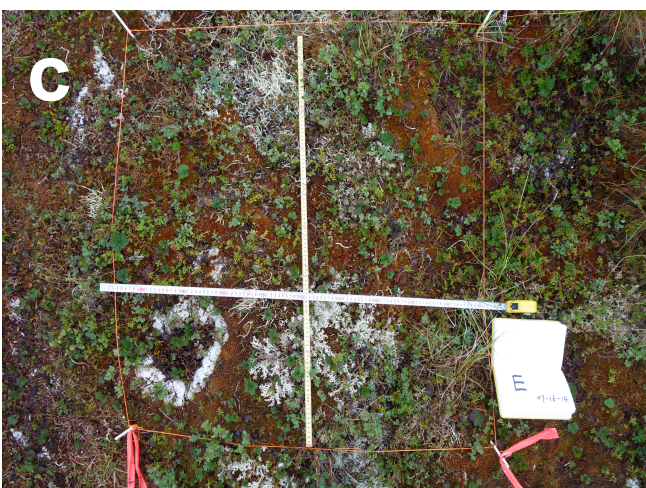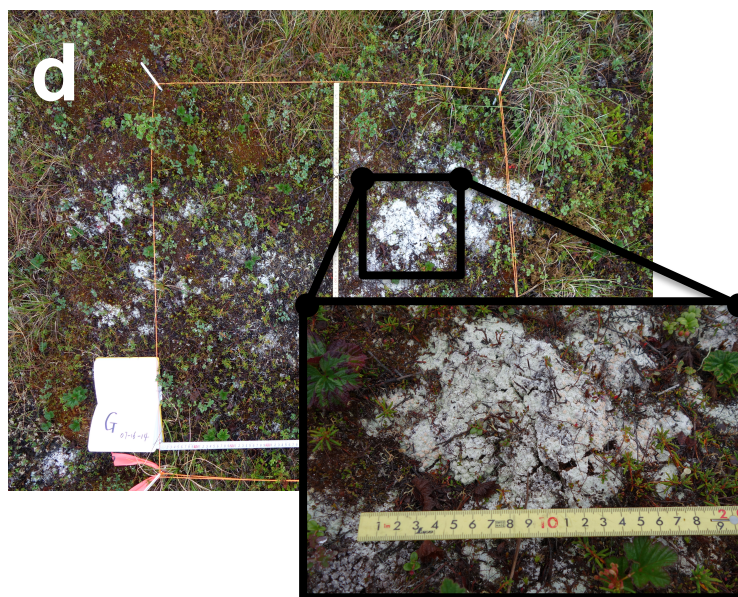



### a. Snow-covering day

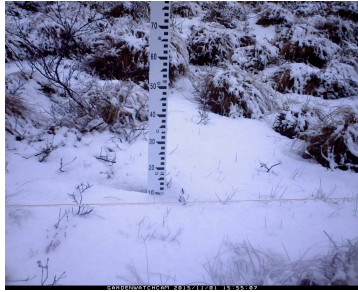

Nov 1, 2015

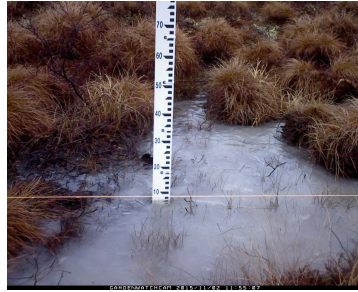

Nov 2, 2015

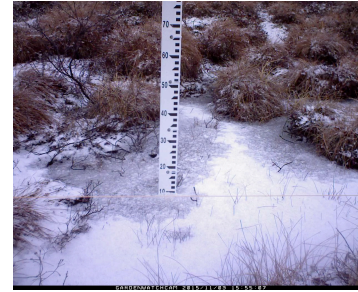

**Nov 3, 2015**

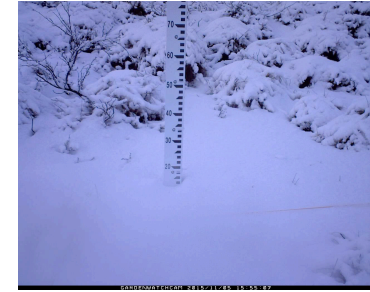

Nov 5, 2015

### b. Snow-disappearing day

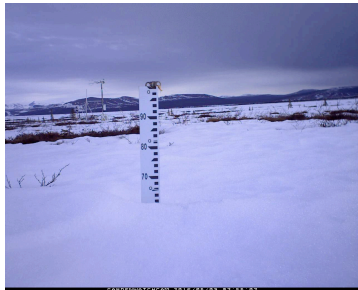

May 3, 2016

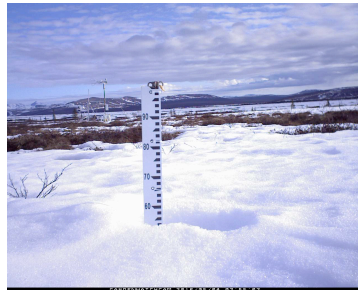

Nov 4, 2015

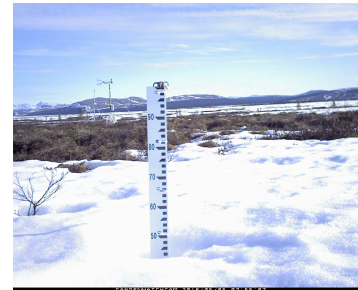

**Nov 5, 2015**

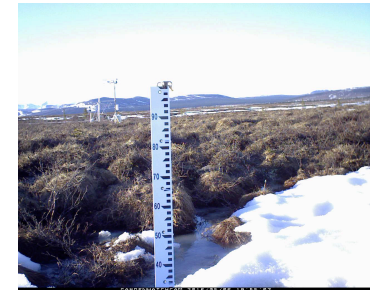

Nov 6, 2015

Supplement: Supplementary file 1 [file bg-2019-121-supplement.zip]
